# Supplementary material for: An L314Q mutation in Map3k1 gene results in failure of eyelid fusion in the N-ethyl-N-nitrosourea-induced mutant line
Source: PubMed Central journal article supplement — Exp Anim. 2021 Jun 2;70(4):459–68. doi: 10.1538/expanim.21-0005 (PMC8614015; doi:10.1538/expanim.21-0005), 2021-06-02
Supplement: expanim-70-459-s001.pdf [file expanim-70-459-s001.pdf]

## Supplementary data

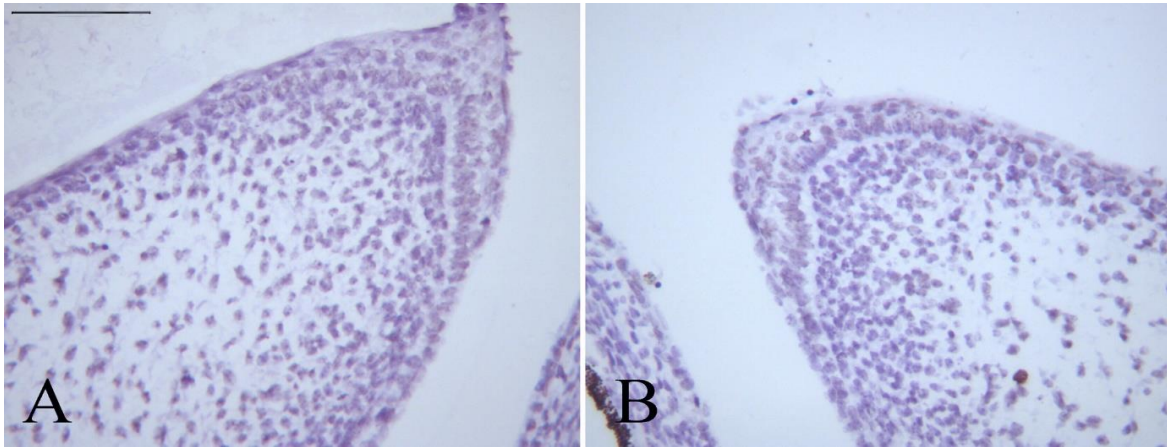

Figure S1. Neither wild-type nor *Map3k1*<sup>L314Q/+</sup> E15.5 fetuses showed significant apoptosis in the eyelid cells.

(A) Wild type      (B) *Map3k1*<sup>L314Q/+</sup>      Scale bar = 100  $\mu$ m

Supplementary Table 1. List of PCR primers

| Primer  | Sequence (5'-3')                                                            | Fragment size (bp) | Template    |
|---------|-----------------------------------------------------------------------------|--------------------|-------------|
| Exon1-1 | F: 5'-CGCAGGCACGAGCGAATGT -3'<br>R: 5'-CGGCGACGGGGAAGTAGATG -3'             | 328                | genomic DNA |
| Exon1-2 | F: 5'- CCGCCCTGCCCATCTACTTCC -3'<br>R: 5'- GCCCCGCTCGCTTCATTCA -3'          | 252                | genomic DNA |
| Exon 2  | F: 5'- GCTGTTTACTTGTGCTTAGGAATCA -3'<br>R: 5'- CTGTGACGGCTTAAGTGGCTTA -3'   | 347                | genomic DNA |
| 1       | F: 5'- GAGAGAATGATCCGGGAGAAGCTCA-3'<br>R: 5'- GCTTGTTCTGACCCATCTTCA-3'      | 856                | cDNA        |
| 2       | F: 5'- CACGCATGTCAAATTGTCACACACTG-3'<br>R: 5'- AGTGTATACCAGCATGGCTCTCAAT-3' | 761                | cDNA        |
| 3       | F: 5'- CTTACTCATTTTGGAAACCCAGCAGA-3'<br>R: 5'- CTGGATGACCTCGGCAATTTCTA-3'   | 990                | cDNA        |
| 4       | F: 5'- CAAGCTGGTAACCATGCTTAATGC -3'<br>R: 5'- CCTGAGACGCTGACATCGCCAT -3'    | 1049               | cDNA        |
| 5       | F: 5'- GACGACACCTACAAAGACGACG -3'<br>R: 5'- GGGATGGACGGTGCAGTAGTT -3'       | 932                | cDNA        |
| 6       | F: 5'- GTATGGTAGGAGCTGTGATGTATGGA-3'<br>R: 5'- GCATATCCTGTCTCCATTAGAGCTG-3' | 304                | cDNA        |
